# Supplementary material
Source: bioRxiv or medRxiv preprint supplement (http://medrxiv.stage.highwire.org/highwire/filestream/95653/field_highwire_adjunct_files/3/2020.09.04.20187906-4.pdf)
Supplement: Supplementary file [file 2020.09.04.20187906-4.pdf]

**D. Average predicted probabilities (and 95% confidence interval) of support for each policy in Scenarios 1, 2, 3 and 4.**

|                                          | <b>Scenario 1</b>    | <b>Scenario 2</b>    | <b>Scenario 3</b>    | <b>Scenario 4</b>     |
|------------------------------------------|----------------------|----------------------|----------------------|-----------------------|
| <b>Avoid social gathering</b>            | 0.67<br>[0.63, 0.70] | 0.73<br>[0.68, 0.77] | 0.80<br>[0.68, 0.91] | 0.44<br>[-0.77, 1.64] |
| <b>School closure</b>                    | 0.34<br>[0.31, 0.38] | 0.53<br>[0.49, 0.58] | 0.89<br>[0.83, 0.96] | 1.00<br>[1.00, 1.00]  |
| <b>Work from home</b>                    | 0.53<br>[0.49, 0.57] | 0.71<br>[0.67, 0.76] | 0.93<br>[0.89, 0.98] | 1.00<br>[1.00, 1.00]  |
| <b>Shut down transportation</b>          | 0.17<br>[0.15, 0.20] | 0.28<br>[0.24, 0.33] | 0.52<br>[0.38, 0.66] | 0.90<br>[0.50, 1.29]  |
| <b>Lockdown</b>                          | 0.26<br>[0.23, 0.29] | 0.46<br>[0.41, 0.50] | 0.76<br>[0.65, 0.86] | 0.99<br>[0.96, 1.02]  |
| <b>Quarantine - restricted countries</b> | 0.81<br>[0.78, 0.84] | 0.79<br>[0.75, 0.83] | 0.82<br>[0.72, 0.93] | 0.70<br>[-0.32, 1.72] |
| <b>Quarantine –all countries</b>         | 0.68<br>[0.64, 0.72] | 0.74<br>[0.69, 0.78] | 0.90<br>[0.83, 0.96] | 1.00<br>[0.99, 1.01]  |
| <b>No entry - restricted countries</b>   | 0.75<br>[0.72, 0.79] | 0.75<br>[0.71, 0.79] | 0.90<br>[0.83, 0.96] | 1.00<br>[0.98, 1.02]  |
| <b>No entry - all countries</b>          | 0.53<br>[0.49, 0.57] | 0.61<br>[0.56, 0.66] | 0.82<br>[0.72, 0.91] | 0.98<br>[0.84, 1.10]  |

*Scenario 1: Total cases = 200, new cases = 5%, ICU cases = 1%, mortality = 1%, number countries = 4*

*Scenario 2: Total cases = 200, new cases = 20%, ICU cases = 10%, mortality = 10%, number countries = 4*

*Scenario 3: Total cases = 2000, new cases = 5%, ICU cases = 1%, mortality = 1%, number countries = 4*

*Scenario 4: Total cases = 2000, new cases = 20%, ICU cases = 10%, mortality = 10%, number countries = 4*
